# Supplementary material for: Longitudinal evaluation of dehydroepiandrosterone (DHEA), its sulfated form and estradiol with cancer-related cognitive impairment in early-stage breast cancer patients receiving chemotherapy
Source: PubMed Central journal article supplement (PMC9529889; doi:10.1038/s41598-022-20420-3), 2022-10-03

**Supplementary Figure 1: Study flow diagram**

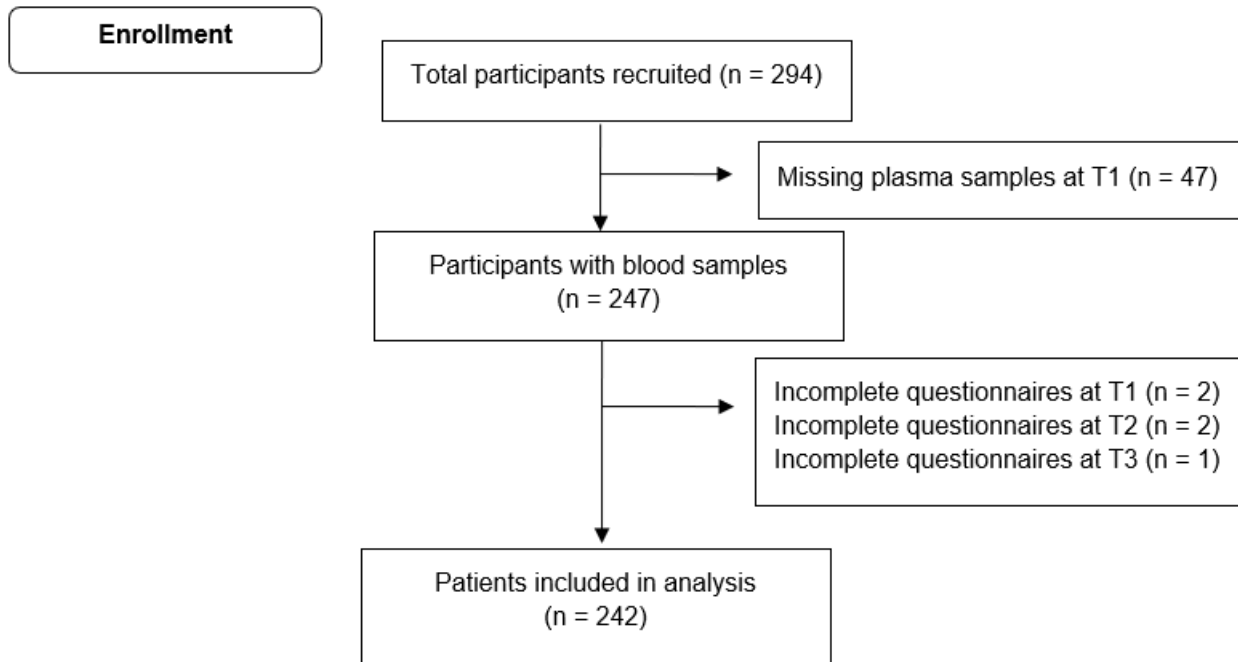

Supplement: 41598_2022_20420_MOESM1_ESM.pdf [file 41598_2022_20420_MOESM1_ESM.pdf]
